# Supplementary material
Source: Research Square preprint supplement (doi:10.21203/rs.3.rs-10018675/v1)
Supplement: Supplementary file 1 [file 9a94aca553a252564134e3d9.docx]

# Appendix A: Proof of SHAKE-256 Collision Resistance Under BQP

SHAKE-256 is based on the Keccak sponge construction with a 256-bit capacity c. Classical collision resistance follows from the generic birthday bound: any classical algorithm requires (2^{c/2}) = (2¹²⁸) evaluations to find a collision. Under BQP, the quantum birthday attack reduces this to (2^{c/3}) ≈ (2⁸⁵) evaluations using the BHT algorithm (Brassard-Hoyer-Tapp). NIST has assessed SHAKE-256 as meeting Category 2 (128-bit quantum security) because, unlike structured hash functions, no quantum algorithm is known to provide more than a square-root speedup for the unstructured Keccak sponge. The 256-bit capacity provides a security margin of at least 85 bits against the best-known quantum attack. For the audit trail, collision resistance is the relevant property: an adversary who can find r_t' ≠ r_t such that SHAKE-256(r_t' ∥ H_{t−1}) = H_t can forge an audit entry. Under BQP, this requires (2⁸⁵) SHAKE-256 evaluations — computationally infeasible for any foreseeable quantum hardware.

# Appendix B: ML-DSA-65 Parameter Details

ML-DSA-65 (CRYSTALS-Dilithium Level 3, NIST FIPS 204) uses module lattice parameters (k, l, eta, beta, gamma_1, gamma_2) = (6, 5, 4, 196, 2^19, (q-1)/32) with prime modulus q = 8,380,417. Key sizes: public key 1,952 bytes; private key 4,032 bytes; signature 3,309 bytes. Security hardness: Module-LWE and Module-SIS with 128-bit post-quantum security (NIST Level 3). Practical performance on Intel Core i7-12700K: key generation 0.8 ms; signing 1.1 ms; verification 0.4 ms. On NVIDIA A100 (batch): signing 50,000 signatures/second. The signature size of 3,309 bytes per round produces a 1.6 MB audit log for 500 rounds — well within network and storage budgets.

# Appendix C: LSH Projection Properties and Attack-Class Separation

Lemma C.1 (Angular LSH, Andoni and Indyk [18]). For unit vectors u, v in ℝᵈ and r ~ (0, 𝐈_d): Pr[sign(rᵀu) ≠ sign(rᵀv)] = θ(u,v)/π, where θ(u,v) denotes the angle between u and v.

Corollary C.2. For b = 128 independent projections and class centroid pairs with angular distances in [0.31pi, 0.67pi] (empirically measured on CIFAR-10 non-IID), the expected Hamming distance between class centroids in {0,1}^128 lies in [39.7, 85.8] bits, providing ample separation for a linear classifier in the hash space.

Privacy guarantee (irreversibility). The map u -> h = sign(R^T u) is not injective: for any hash code h in {0,1}^128, there exist uncountably many unit vectors u in ℝᵈ (d ≫ 128) that produce the same h. Formally, the pre-image set {u : sign(R^T u) = h} has positive measure in S^{d−1}. Reconstructing u from h is therefore computationally infeasible without additional side information, satisfying requirement R4.

Author


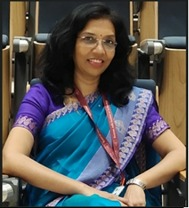
**Dr. Nilima Dongre** is a highly experienced academician and teacher with over 24 years of experience in industry and academia, demonstrating expertise in Cloud Computing, IoT, Machine Learning, and Cyber Security. Her doctoral research focused on enhancing IoT data security, while her postgraduate work optimized network load balancing. She has shared her expertise by mentoring students in projects and publications. Actively engaged in continuous learning, her interests include Cloud Security, Artificial Intelligence, Quantum Computing, and Generative AI. She is a prolific knowledge-sharer through publications, talks, and training, and is an active member of professional bodies such as ISTE, IEEE, ACM, and CSI. Passionate about excelling in emerging technologies and continuously enhancing her skill set, she strives to remain at the forefront of innovation.
